# Supplementary material for: Antibiotic stories: a mixed-methods, multi-country analysis of household antibiotic use in Malawi, Uganda and Zimbabwe
Source: PubMed Central journal article supplement — BMJ Glob Health. 2021 Nov 26;6(11):e006920. doi: 10.1136/bmjgh-2021-006920 (PMC8628329; doi:10.1136/bmjgh-2021-006920), 2021-11-26
Supplement: bmjgh-2021-006920supp001.pdf [file bmjgh-2021-006920supp001.pdf]

**SUPPLEMENTARY MATERIAL****Antibiotics Contained in the Survey Drug Bags**

| Survey                                                   | ZU <sup>1</sup> | ZU <sup>2</sup> | MR <sup>1</sup> | MR <sup>2</sup> | UU | UR |
|----------------------------------------------------------|-----------------|-----------------|-----------------|-----------------|----|----|
| Total antibiotics (by compound)                          | 30              | 30              | 27              | 27              | 37 | 16 |
| Total antibiotics (by compound + mode of administration) | 43              | 43              | 34              | 34              | 44 | 16 |
| Amoxicillin (Tablet)                                     | Y               | Y               | Y               | Y               | Y  | Y  |
| Amoxicillin (Suspension)                                 | Y               | Y               | Y               | Y               | Y  | N  |
| Amoxicillin / clavulanic acid (Tablet)*                  | Y               | Y               | Y               | Y               | Y  | N  |
| Amoxicillin / clavulanic acid (Suspension)*              | Y               | N               | N               | N               | Y  | N  |
| Ampicillin (Tablet)                                      | N               | N               | Y               | N               | Y  | Y  |
| Ampicillin (Suspension)                                  | N               | N               | N               | N               | Y  | N  |
| Ampicillin / cloxacillin (Tablet)                        | N               | N               | N               | N               | Y  | Y  |
| Ampicillin / cloxacillin (Suspension)                    | N               | N               | N               | N               | Y  | Y  |
| Ampicillin (Injection)                                   | Y               | Y               | N               | N               | Y  | N  |
| Azithromycin (Tablet)                                    | Y               | Y               | Y               | Y               | Y  | Y  |
| Azithromycin (Suspension)                                | Y               | Y               | N               | N               | Y  | N  |
| Benzathine Penicillin (Injection)                        | Y               | Y               | Y               | Y               | Y  | Y  |
| Benzylpenicillin (Injection)                             | Y               | Y               | Y               | Y               | Y  | Y  |
| Cefaclor (Tablet)                                        | Y               | Y               | N               | N               | Y  | N  |
| Cefalexin (Tablet)                                       | Y               | Y               | Y               | Y               | Y  | Y  |
| Cefalexin (Suspension)                                   | Y               | Y               | N               | N               | Y  | N  |
| Cefixime (Tablet)                                        | N               | N               | Y               | Y               | Y  | N  |
| Ceftriaxone (Injection)                                  | Y               | Y               | Y               | Y               | Y  | N  |
| Cefuroxime (Tablet)                                      | Y               | Y               | Y               | Y               | N  | N  |
| Cefuroxime (Suspension)                                  | Y               | Y               | N               | N               | Y  | N  |
| Chloramphenicol (Tablet)                                 | Y               | Y               | Y               | Y               | Y  | Y  |
| Chloramphenicol (Injection)                              | Y               | Y               | Y               | Y               | N  | N  |
| Ciprofloxacin (Tablet)                                   | Y               | Y               | Y               | Y               | Y  | Y  |
| Ciprofloxacin (Suspension)                               | Y               | N               | N               | N               | N  | N  |
| Clarithromycin (Tablet)                                  | Y               | Y               | Y               | Y               | N  | N  |
| Clindamycin (tablets)                                    | Y               | Y               | Y               | Y               | Y  | N  |
| Clindamycin (Injectable)                                 | Y               | Y               | Y               | Y               | Y  | N  |

|                                       |   |   |   |   |   |   |
|---------------------------------------|---|---|---|---|---|---|
| Cloxacillin (Tablet)                  | Y | Y | Y | Y | Y | N |
| Cloxacillin (Suspension)              | N | N | Y | Y | N | N |
| Cloxacillin (Injection)               | Y | Y | N | N | Y | N |
| Cotrimoxazole (Tablet)                | Y | Y | Y | Y | Y | Y |
| Cotrimoxazole (Suspension)            | Y | N | Y | Y | Y | N |
| Doxycycline (Tablet)                  | Y | Y | Y | Y | Y | Y |
| Erythromycin (Tablet)                 | Y | Y | Y | Y | Y | Y |
| Erythromycin (Suspension)             | Y | N | Y | Y | N | N |
| Flucloxacillin (Tablet)               | N | N | Y | Y | N | N |
| Flucloxacillin / amoxicillin (Tablet) | N | N | Y | Y | N | N |
| Gentamicin (Injection)                | Y | Y | Y | Y | Y | N |
| Imipenem (Injection)                  | Y | Y | N | N | Y | N |
| Kanamycin (Injection)                 | Y | Y | N | N | Y | N |
| Levofloxacin (Tablet)                 | Y | Y | Y | Y | Y | N |
| Metronidazole (Tablet)                | Y | Y | Y | Y | Y | Y |
| Metronidazole (Suspension)            | Y | Y | Y | Y | Y | N |
| Metronidazole (Injection)             | Y | Y | N | N | Y | N |
| Metronidazole / Norfloxacin (Tablet)  | N | N | Y | Y | N | N |
| Nalidixic acid (Tablet)               | Y | Y | N | N | Y | N |
| Nalidixic acid (Suspension)           | Y | Y | N | N | Y | N |
| Nitrofurantoin (Tablet)               | Y | Y | N | N | Y | N |
| Norfloxacin (Tablet)                  | Y | Y | N | N | Y | N |
| Ofloxacin (Tablet)                    | N | N | N | N | Y | N |
| Ofloxacin / Ornidazole (Tablet)       | N | N | Y | Y | N | N |
| Procaine Penicillin (Injection)       | Y | Y | N | N | Y | N |
| Penicillin V (Tablet)                 | N | N | Y | Y | Y | Y |
| Roxithromycin (Tablet)                | Y | Y | N | N | N | N |
| Secnidazole (Tablet)                  | Y | Y | N | N | N | N |
| Tetracycline (Tablet)                 | N | N | Y | Y | Y | Y |
| Vancomycin (Injection)                | Y | Y | N | Y | N | N |

\*Amoxicillin and amoxicillin/clavulanic acid were combined during analysis.
